# Supplementary material for: Effect of an Intensified Combined Electromyography and Visual Feedback Training on Facial Grading in Patients With Post-paralytic Facial Synkinesis
Source: Frontiers journal article supplement (doi:10.3389/fresc.2021.746188), 2021-10-14
Supplement: Data_Sheet_2.pdf [file Data_Sheet_2.pdf]

**Supplementary Table 2:** Overview about the four facial grading systems

**Effect of an intensified combined electromyography and visual feedback training on facial grading in patients with postparalytic facial synkinesis**

G.F. Volk<sup>1,2</sup>, B. Roediger<sup>1</sup>, K. Geißler<sup>1,2</sup>, A.-M. Kутtenreich<sup>1,2</sup>, C.M. Klingner<sup>2,3</sup>, C. Dobel<sup>1,2</sup>, O. Guntinas-Lichius<sup>1,2</sup>

<sup>1</sup>Department of Otorhinolaryngology, Jena University Hospital, Jena, Germany

<sup>2</sup>Facial Nerve Center, Jena University Hospital, Jena, Germany

<sup>3</sup>Department of Neurology, Jena University Hospital, Jena, Germany

Correspondence to: Orlando Guntinas-Lichius  
Department of Otorhinolaryngology  
Jena University Hospital  
Am Klinikum 1  
D-07747 Jena, Germany  
Tel. +49-3641-9329301  
Fax. +49-3641-9329302  
Email: [orlando.guntinas@med.uni-jena.de](mailto:orlando.guntinas@med.uni-jena.de)

| <b>Supplementary Table 2.</b> Overview about the four facial grading systems* |                                                                                                                                                                                                                                                                                                                                                                                                                                                                                                                                         |                                                                                                                                                                                                                      |
|-------------------------------------------------------------------------------|-----------------------------------------------------------------------------------------------------------------------------------------------------------------------------------------------------------------------------------------------------------------------------------------------------------------------------------------------------------------------------------------------------------------------------------------------------------------------------------------------------------------------------------------|----------------------------------------------------------------------------------------------------------------------------------------------------------------------------------------------------------------------|
| <b>Grading system</b>                                                         | <b>Categories</b>                                                                                                                                                                                                                                                                                                                                                                                                                                                                                                                       | <b>Comment</b>                                                                                                                                                                                                       |
| House-Brackmann (HB) facial nerve grading system                              | <p>I - Normal</p> <p>II - Mild dysfunction (slight weakness, normal symmetry at rest)</p> <p>III - Moderate dysfunction (obvious but not disfiguring weakness with synkinesis, normal symmetry at rest) Complete eye closure w/ maximal effort, good forehead movement</p> <p>IV - Moderately severe dysfunction (obvious and disfiguring asymmetry, significant synkinesis) Incomplete eye closure, moderate forehead movement</p> <p>V - Severe dysfunction (barely perceptible motion)</p> <p>VI - Total paralysis (no movement)</p> | Gross system, no category for synkinesis                                                                                                                                                                             |
| Stennert Index (SI)                                                           | <p>Resting score</p> <p>Bilateral palpebral fissure difference <math>\geq 3\text{mm}</math></p> <p>Lower eyelid ectropion Yes</p> <p>Nasolabial fold loss Yes</p> <p>Ptosis of labial angle <math>\geq 3\text{mm}</math></p> <p>Movement score</p> <p>Palpebral fissure could not close</p> <p>While sleeping Yes</p> <p>Maximum activation Yes</p>                                                                                                                                                                                     | <p>One point per item, i.e. maximal ten points, higher score = more dysfunction;</p> <p>Synkinesis is not addressed in the Stennert Index. Stennert developed an extra score for synkinesis that is seldom used.</p> |

|  |                                                                                             |             |
|--|---------------------------------------------------------------------------------------------|-------------|
|  | Showing teeth                                                                               |             |
|  | Upper and lower canines                                                                     | Not visible |
|  | Upper lateral incisors                                                                      | Not visible |
|  | Whistle                                                                                     |             |
|  | distance between philtrum and corner of the mouth on diseased side compared to healthy side |             |
|  | >50%                                                                                        |             |

Facial Nerve Grading  
System 2.0 (FNGS 2.0)

| Score                                                        | Region                                                         |                                                                               |                                                        |                                                        |
|--------------------------------------------------------------|----------------------------------------------------------------|-------------------------------------------------------------------------------|--------------------------------------------------------|--------------------------------------------------------|
|                                                              | Brow                                                           | Eye                                                                           | NLF                                                    | Oral                                                   |
| 1                                                            | Normal                                                         | Normal                                                                        | Normal                                                 | Normal                                                 |
| 2                                                            | Slight weakness<br>>75% of normal                              | Slight weakness<br>>75% of normal<br>Complete closure with<br>mild effort     | Slight weakness<br>>75% of normal                      | Slight weakness<br>>75% of normal                      |
| 3                                                            | Obvious weakness<br>>50% of normal<br>Resting symmetry         | Obvious weakness<br>>50% of normal<br>Complete closure with<br>maximal effort | Obvious weakness<br>>50% of normal<br>Resting symmetry | Obvious weakness<br>>50% of normal<br>Resting symmetry |
| 4                                                            | Asymmetry at rest<br><50% of normal<br>Cannot close completely | Asymmetry at rest<br><50% of normal                                           | Asymmetry at rest<br><50% of normal                    | Asymmetry at rest<br><50% of normal                    |
| 5                                                            | Trace movement                                                 | Trace movement                                                                | Trace movement                                         | Trace movement                                         |
| 6                                                            | No movement                                                    | No movement                                                                   | No movement                                            | No movement                                            |
| Secondary movement (global assessment)                       |                                                                |                                                                               |                                                        |                                                        |
| Score                                                        | Degree of movement                                             |                                                                               |                                                        |                                                        |
| 0                                                            | None                                                           |                                                                               |                                                        |                                                        |
| 1                                                            | Slight synkinesis; minimal contracture                         |                                                                               |                                                        |                                                        |
| 2                                                            | Obvious synkinesis; mild to moderate contracture               |                                                                               |                                                        |                                                        |
| 3                                                            | Disfiguring synkinesis; severe contracture                     |                                                                               |                                                        |                                                        |
| Reporting: sum scores for each region and secondary movement |                                                                |                                                                               |                                                        |                                                        |
| Grade                                                        | Total score                                                    |                                                                               |                                                        |                                                        |
| I                                                            | 4                                                              |                                                                               |                                                        |                                                        |
| II                                                           | 5-9                                                            |                                                                               |                                                        |                                                        |
| III                                                          | 10-14                                                          |                                                                               |                                                        |                                                        |
| IV                                                           | 15-19                                                          |                                                                               |                                                        |                                                        |
| V                                                            | 20-23                                                          |                                                                               |                                                        |                                                        |
| VI                                                           | 24                                                             |                                                                               |                                                        |                                                        |
| NLF, nasolabial fold.                                        |                                                                |                                                                               |                                                        |                                                        |

FNGS 2.0 includes an subcategory on “secondary movements”, classifying the severity of synkinetic activity; higher synkinesis score = more synkinetic dysfunction;

Higher total score = higher facial dysfunction

# Sunnybrook Facial Grading System (SFGS)

| Sunnybrook Facial Grading System                                                                          |  |                                                                                                                                                                                                                                                                                                                                        |  |  |  |  |                                                                                                                                                                                                                         |  |  |
|-----------------------------------------------------------------------------------------------------------|--|----------------------------------------------------------------------------------------------------------------------------------------------------------------------------------------------------------------------------------------------------------------------------------------------------------------------------------------|--|--|--|--|-------------------------------------------------------------------------------------------------------------------------------------------------------------------------------------------------------------------------|--|--|
| <b>Resting Symmetry</b><br>Compared to normal side                                                        |  | <b>Symmetry of Voluntary Movement</b><br>Degree of muscle EXCURSION compared to normal side                                                                                                                                                                                                                                            |  |  |  |  | <b>Synkinesis</b><br>Rate the degree of INVOLUNTARY MUSCLE CONTRACTION associated with each expression                                                                                                                  |  |  |
| <b>Eye</b> (choose one only)<br>normal 0<br>narrow 1<br>wide 1<br>eyelid surgery 1                        |  | Standard Expressions: Unable to initiate movement, Initiates slight movement, Initiates movement with mid excursion, Movement almost complete, Movement complete                                                                                                                                                                       |  |  |  |  | NONE: no synkinesis or mass movement<br>MILD: slight synkinesis of one or more muscles<br>MODERATE: obvious synkinesis of one or more muscles<br>SEVERE: disfiguring synkinesis; gross mass movement of several muscles |  |  |
| <b>Cheek (nasolabial fold)</b><br>normal 0<br>absent 2<br>less pronounced 1<br>more pronounced 1          |  | <b>Brow lift (FRD)</b> 1 2 3 4 5 <input type="checkbox"/><br><b>Gentle eye closure (OCS)</b> 1 2 3 4 5 <input type="checkbox"/><br><b>Open mouth smile (ZYG/RIS)</b> 1 2 3 4 5 <input type="checkbox"/><br><b>Snarl (LLA/LLS)</b> 1 2 3 4 5 <input type="checkbox"/><br><b>Lip Pucker (OOS/OOI)</b> 1 2 3 4 5 <input type="checkbox"/> |  |  |  |  | 0 1 2 3 <input type="checkbox"/><br>0 1 2 3 <input type="checkbox"/>                                        |  |  |
| <b>Mouth</b><br>normal 0<br>corner drooped 1<br>corner pulled up/out 1                                    |  | Gross Asymmetry, Severe Asymmetry, Moderate Asymmetry, Mild Asymmetry, Normal Symmetry                                                                                                                                                                                                                                                 |  |  |  |  | 0 1 2 3 <input type="checkbox"/><br>0 1 2 3 <input type="checkbox"/>                                                                                                                                                    |  |  |
| <b>Total</b> <input type="checkbox"/><br><b>Resting symmetry score</b> Total × 5 <input type="checkbox"/> |  | <b>Total</b> <input type="checkbox"/><br><b>Voluntary movement score:</b> Total × 4 <input type="checkbox"/>                                                                                                                                                                                                                           |  |  |  |  | <b>Synkinesis score:</b> Total <input type="checkbox"/>                                                                                                                                                                 |  |  |
| Patient's name _____<br>Dx _____<br>Date _____                                                            |  | <b>Vol mov't score</b> <input type="checkbox"/> - <b>Resting symmetry score</b> <input type="checkbox"/> = <b>Synk score</b> <input type="checkbox"/> = <b>Composite score</b> <input type="checkbox"/>                                                                                                                                |  |  |  |  |                                                                                                                                                                                                                         |  |  |

© 1992 Ross BG, Fradet G, Nedreiskal JM  
Sunnybrook Health Science Centre

SFGS 2.0 includes an subcategory on "synkinesis," classifying the severity of synkinetic activity; higher synkinesis score = more synkinetic dysfunction;

BUT: Higher total score = less facial dysfunction

\*References: See main article.
